# Supplementary material
Source: PubMed Central journal article supplement (PMC8031976)
Supplement: JCH-18-456-s002.pdf [file JCH-18-456-s002.pdf]

**Supplemental Table 2. Risk of Bias Assessment Checklist**

|                                    | Were subject's assessed <sup>a</sup> and excluded if they did not adhere to PABA? |            | Did studies utilizing the colorimetric method for PABA assessment exclude participants taking medications? (paracetamol, sulphonamides) |                    | If participants >60 years, was the collection time period >24 hours? |            |
|------------------------------------|-----------------------------------------------------------------------------------|------------|-----------------------------------------------------------------------------------------------------------------------------------------|--------------------|----------------------------------------------------------------------|------------|
| Study                              | Reviewer 1                                                                        | Reviewer 2 | Reviewer 1                                                                                                                              | Reviewer 2         | Reviewer 1                                                           | Reviewer 2 |
| Fu <sup>18</sup>                   | Yes                                                                               | Yes        | NA                                                                                                                                      | Yes/NA             | NA                                                                   | NA         |
| Subar et al <sup>24</sup>          | No                                                                                | No         | Maybe                                                                                                                                   | Maybe <sup>b</sup> | No                                                                   | No         |
| De Keyzer et al <sup>23</sup>      | Yes                                                                               | Yes        | Yes                                                                                                                                     | Yes                | No                                                                   | No         |
| Murakami et al <sup>20</sup>       | Yes                                                                               | Yes        | Yes                                                                                                                                     | Yes                | NA                                                                   | NA         |
| Bingham et al <sup>25</sup>        | Yes                                                                               | Yes        | Yes                                                                                                                                     | Yes                | No                                                                   | No         |
| Leclercq et al <sup>21</sup>       | Yes                                                                               | Yes        | Yes                                                                                                                                     | Yes                | Yes                                                                  | Yes        |
| Williams and Bingham <sup>19</sup> | Yes                                                                               | No         | Yes                                                                                                                                     | Yes                | NA                                                                   | NA         |
| Knuiman et al <sup>22</sup>        | Unclear/No                                                                        | No         | No                                                                                                                                      | No                 | NA                                                                   | NA         |

<sup>a</sup>Adherence assessment for studies was based on self-report with the exception of Bingham et al<sup>25</sup> who assessed based on PABA recovery of 0%.

<sup>b</sup>PABA was assessed more completely through the use of HPLC method for colorimetric results >110%; however, no exclusions were based on HPLC results.
